# Supplementary material for: Perinatal Factors and Regional Brain Volume Abnormalities at Term in a Cohort of Extremely Low Birth Weight Infants
Source: PubMed Central journal article supplement (PMC3650008; doi:10.1371/journal.pone.0062804), 2013-05-09
Supplement: pone.0062804.s002.pdf [file pone.0062804.s002.pdf]

**Table S2.** Clinical factors significantly associated with brain regional volumes (mL) in multivariable regression models.

| <b>Antecedent</b>                            | <b>Region</b>        | <b>Mean Volume Difference (95% CI) Adjusted by PMA at MRI</b> | <b>Mean Volume Difference (95% CI) Adjusted by PMA at MRI and TCV</b> | <b>Mean Volume Difference (95% CI) Adjusted by PMA at MRI and Total Brain Tissue Volume</b> |
|----------------------------------------------|----------------------|---------------------------------------------------------------|-----------------------------------------------------------------------|---------------------------------------------------------------------------------------------|
| <i>Antenatal</i>                             |                      |                                                               |                                                                       |                                                                                             |
| <b>Maternal hypertension</b>                 | Brainstem            |                                                               | 0.25 (0.08, 0.43)*                                                    |                                                                                             |
| <i>Intrapartum</i>                           |                      |                                                               |                                                                       |                                                                                             |
| <b>Maternal antibiotic therapy</b>           | Corpus callosum      | 0.15 (0.05, 0.25)*                                            | 0.15 (0.05, 0.24)*                                                    | 0.16 (0.06, 0.25)*                                                                          |
| <i>At Birth</i>                              |                      |                                                               |                                                                       |                                                                                             |
| <b>Apgar score &lt;5 at 5 min.</b>           | Lenticular nuclei    | -0.69 (-1.08,-0.31)**                                         | -0.57 (-0.88, -0.26)**                                                | -0.46 (-0.5, -0.18)*                                                                        |
|                                              | Caudate/accumbens    | -0.07 (-0.11, -0.03)*                                         |                                                                       | -0.14 (-0.21, -0.06)*                                                                       |
|                                              | Brainstem            |                                                               |                                                                       | -0.36 (-0.61, -0.11)*                                                                       |
| <b>Birth weight (per 100g increase)</b>      | Total brain tissue   | 10.65 (6.50,14.80)**                                          |                                                                       |                                                                                             |
|                                              | Cortical GM          | 4.47 (2.58, 6.36)**                                           |                                                                       |                                                                                             |
|                                              | Cerebral WM          | 5.52 (3.46, 7.58)**                                           |                                                                       |                                                                                             |
|                                              | Total CSF            | 0.57 (0.28, 0.86)**                                           |                                                                       |                                                                                             |
|                                              | Cerebellum           | 0.88 (0.50, 1.25)**                                           |                                                                       |                                                                                             |
|                                              | Caudate/accumbens    | 0.03 (0.02, 0.04)**                                           |                                                                       |                                                                                             |
|                                              | Corpus callosum      | 0.05 (0.02, 0.09)*                                            |                                                                       |                                                                                             |
|                                              | Thalamus             | 0.27 (0.13, 0.41)**                                           |                                                                       |                                                                                             |
|                                              | Lenticular nuclei    | 0.17 (0.08, 0.26)**                                           |                                                                       |                                                                                             |
|                                              | Brainstem            | 0.27 (0.18, 0.36)**                                           |                                                                       |                                                                                             |
|                                              | Total cranial volume | 17.66 (11.83, 23.49)**                                        |                                                                       |                                                                                             |
| <b>Small for gestational age (&lt;10th%)</b> | Total brain tissue   | -22.99 (-36.72, -9.26)*                                       |                                                                       |                                                                                             |
|                                              | Hippocampus          | -0.18 (-0.28, -0.07)*                                         |                                                                       |                                                                                             |
|                                              | Caudate/accumbens    | -0.01, (-0.02, -0.002)*                                       |                                                                       |                                                                                             |

|                                                          |                      |                          |                           |                        |
|----------------------------------------------------------|----------------------|--------------------------|---------------------------|------------------------|
|                                                          | Amygdalae            | -0.07 (-0.10, -0.03)*    |                           |                        |
|                                                          | Total cranial volume | -30.24 (-50.23, -10.25)* |                           |                        |
| <i>NICU</i>                                              |                      |                          |                           |                        |
| <b>Pneumothorax</b>                                      | Lenticular nuclei    |                          | -0.71 (-1.21, -0.21)*     | -0.76 (-1.21, -0.30)*  |
|                                                          | Caudate/accumbens    |                          | -0.18 (-0.29, -0.05)*     |                        |
| <b>Pulmonary hemorrhage</b>                              | Total brain tissue   |                          | -34.70 (-54.10, -15.31)** |                        |
|                                                          | Cerebral WM          |                          | -16.05 (-27.63, -4.47)*   |                        |
|                                                          | Total CSF            | 4.01 (0.87, 8.29)*       |                           |                        |
|                                                          | Caudate/accumbens    |                          | -0.31 (-0.45, -0.14)*     |                        |
|                                                          | Hippocampi           |                          | -0.38 (-0.63, -0.12)*     |                        |
|                                                          | Brainstem            |                          | -0.93 (-1.48, -0.37)*     |                        |
| <b>WM injury on cranial US (within 28 days of birth)</b> | Total brain tissue   |                          | -22.72 (-32.19, -13.25)** |                        |
|                                                          | Total CSF            |                          | 3.42 (1.27, 5.81)*        |                        |
|                                                          | Thalamus             |                          | -1.27 (-1.73, -0.81)**    | -0.69 (-1.05, -0.32)** |
|                                                          | Lenticular nuclei    | -0.72 (-1.12, -0.32)*    | -0.91 (-1.24, -0.57)**    | -0.66 (-0.97, -0.36)*  |
|                                                          | Brainstem            |                          | -0.47 (-0.76, -0.18)*     |                        |
| <b>Germinal matrix/intra-ventricular hemorrhage</b>      | Cortical GM          |                          |                           | 5.35 (2.80, 7.91)**    |
|                                                          | Cerebellum           |                          | -2.14 (-3.15, -1.14)**    | -2.11 (-3.23, -1.00)** |
|                                                          | Total CSF            | 2.21 (1.04, 3.54)**      |                           | 4.01 (1.74, 6.57)**    |
| <b>Treated seizures</b>                                  | Total brain tissue   | -37.59 (-63.93, -11.25)* |                           |                        |
|                                                          | Cerebral WM          | -22.97 (-36.28, -9.66)*  | -15.65 (-25.03, -6.26)*   |                        |
|                                                          | Cortical GM          |                          |                           | 6.60 (1.98, 11.22)*    |
|                                                          | Total CSF            |                          | 4.70 (1.58, 8.35)*        |                        |
|                                                          | Hippocampus          | -0.24 (-0.43, -0.06)*    |                           |                        |
| <b>Apnea/Caffeine therapy</b>                            | Total brain tissue   | -33.35(-51.75, -14.95)*  |                           |                        |
|                                                          | Cerebral WM          | -17.71 (-26.73, -8.68)*  | -12.60 (-19.13, -6.07)*   |                        |
|                                                          | Cortical GM          |                          |                           | 6.81 (3.55, 10.07)**   |

|                                                                         |                              |                        |                       |                       |
|-------------------------------------------------------------------------|------------------------------|------------------------|-----------------------|-----------------------|
|                                                                         | Hippocampus                  | -0.19 (-0.32, -0.06)*  |                       |                       |
|                                                                         | Thalamus                     | -0.84 (-1.45, -0.23)*  |                       |                       |
|                                                                         | Lenticular nuclei            | -0.92 (-1.37, -0.47)** |                       |                       |
|                                                                         | Brainstem                    | -0.55 (-0.91, -0.20)*  |                       |                       |
| <b>Caffeine therapy duration (per 30 days increase)</b>                 | Caudate/accumbens            |                        | 0.06 (0.02, 0.10)*    | 0.07 (0.03, 0.11)*    |
|                                                                         | Lenticular nuclei            | 0.27 (0.07, 0.47)*     |                       |                       |
| <b>Parenteral nutrition duration (per 10 days increase)</b>             | Total brain tissue           | -3.12 (-5.43, -0.80)*  |                       |                       |
|                                                                         | Caudate/accumbens            |                        | -0.02 (-0.03, -0.01)* |                       |
|                                                                         | Amygdalae                    | -0.01 (-0.02, -0.007)* |                       |                       |
|                                                                         | Brainstem                    | -0.07 (-0.12, -0.03)*  |                       |                       |
| <b>Corticosteroids for BPD</b>                                          | Total CSF                    |                        |                       | -2.67 (-4.16, -1.00)* |
| <b>PDA surgical ligation</b>                                            | Caudate/accumbens            |                        |                       | 0.13 (0.06, 0.21)**   |
| <b>Major surgery</b>                                                    | Lenticular nucleus           |                        |                       | 0.36 (0.16, 0.56)*    |
| <b>GI surgery</b>                                                       | Cerebellum                   | -2.76 (-4.70, -0.83)*  |                       |                       |
|                                                                         | WMH/Cerebral WM <sup>a</sup> | 8.08 (2.28, 14.56)*    | 7.57 (1.89, 13.89)*   | 8.25 (2.35, 14.86)*   |
| <b>Surgical therapy for Severe ROP</b>                                  | WMH/Cerebral WM <sup>a</sup> | 5.73 (2.01, 9.75)*     | 6.34 (2.51, 10.48)*   | 6.04 (2.14, 10.28)*   |
| <b>Duration of oxygen supplementation at 36 weeks PMA (per 30 days)</b> | Total CSF                    | 0.79 (0.27, 1.31)*     |                       |                       |

\* $p < 0.01$  \*\* $p < 0.001$

<sup>a</sup> Reported as a percentage mean difference in WMH to cerebral white matter volume (95% CI).
